# Supplementary material for: KNa3Mn7(PO4)6: 2D spin-frustrated magnetic material with a diamond-like chain structure
Source: Royal Society of Chemistry journal article supplement (doi:10.1039/c4ra01122h), 2014-01-01
Supplement: c4ra01122h1.pdf [file c4ra01122h1.pdf]

## Supporting Information

### **$\text{KNa}_3\text{Mn}_7(\text{PO}_4)_6$ : 2D Spin Frustrated Magnetic Material with a Diamond-like Chain Structure**

Wenbin Guo,<sup>†,‡</sup> Zhangzhen He<sup>\*,†</sup>, Suyun Zhang<sup>†</sup>, Ming Yang<sup>†</sup>, Yingying Tang<sup>†</sup>,

and Wendan Cheng<sup>†</sup>

<sup>†</sup>State Key Laboratory of Structural Chemistry, Fujian Institute of Research on the Structure of Matter, Chinese Academy of Sciences, Fuzhou, Fujian 350002, China.

**Corresponding author:** Zhangzhen He, State Key Laboratory of Structural Chemistry, Fujian Institute of Research on the Structure of Matter, Chinese Academy of Sciences, Fuzhou 350002, P. R. China

Phone: 86-591-8379-2649

Fax: 86-591-8379-2649

E-mail: [hezz@fjirsm.ac.cn](mailto:hezz@fjirsm.ac.cn)

**Figure S1.** Simulated (black line) and experimental (red line) powder X-ray (Cu K $\alpha$ ) diffraction patterns of  $\text{KNa}_3\text{Mn}_7(\text{PO}_4)_6$ .

**Figure S2.** Different polyhedra built by Mn atoms.

**Figure S3.** Oxygen-coordination environment of Mn and P atoms.

**Figure S4.** Perspective view of  $\text{KNa}_3\text{Mn}_7(\text{PO}_4)_6$ . The transparent polyhedra respect the pseudo-two-dimensional slabs.

**Figure S5.** Dc magnetic susceptibility measured at 0.1 T for  $\text{KNa}_3\text{Mn}_7(\text{PO}_4)_6$ .

**Figure S6.** The low-temperature susceptibility for  $\text{KNa}_3\text{Mn}_7(\text{PO}_4)_6$  measured at 500 Oe with field-cooling (FC) and zero-field-cooling (ZFC) regimes.

**Table S1.** Crystal data and structure refinement of  $\text{KNa}_3\text{Mn}_7(\text{PO}_4)_6$ .

**Table S2.** Atomic coordinates and equivalent isotropic displacement parameters of  $\text{KNa}_3\text{Mn}_7(\text{PO}_4)_6$ .

**Table S3.** Selected bond lengths and angles of  $\text{KNa}_3\text{Mn}_7(\text{PO}_4)_6$ .

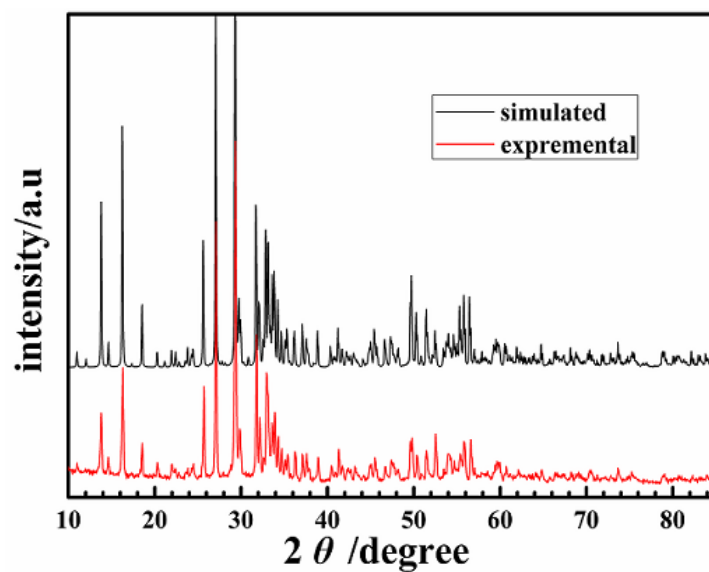

**Figure S1.** Simulated (black line) and experimental (red line) powder X-ray (Cu  $K\alpha$ ) diffraction patterns of  $\text{KNa}_3\text{Mn}_7(\text{PO}_4)_6$ .

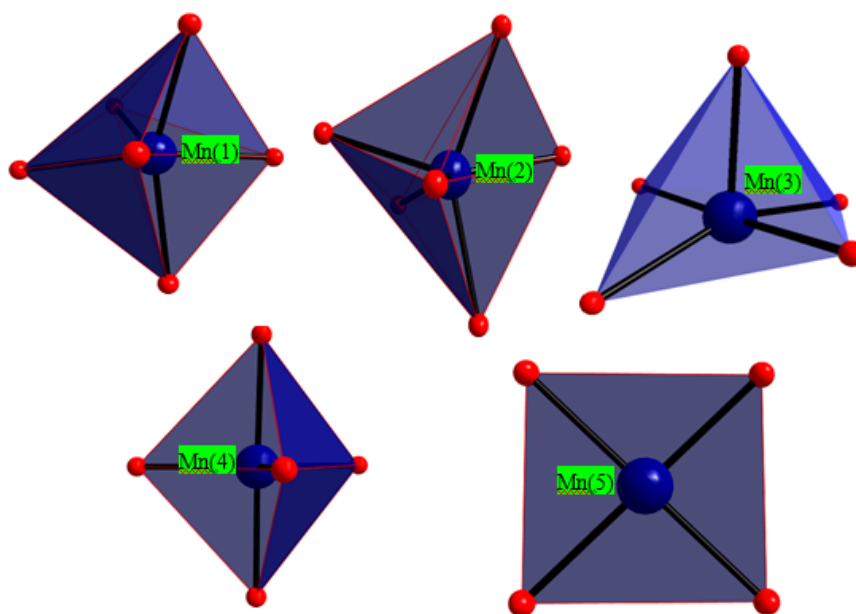

**Figure S2.** Different polyhedra built by Mn atoms.

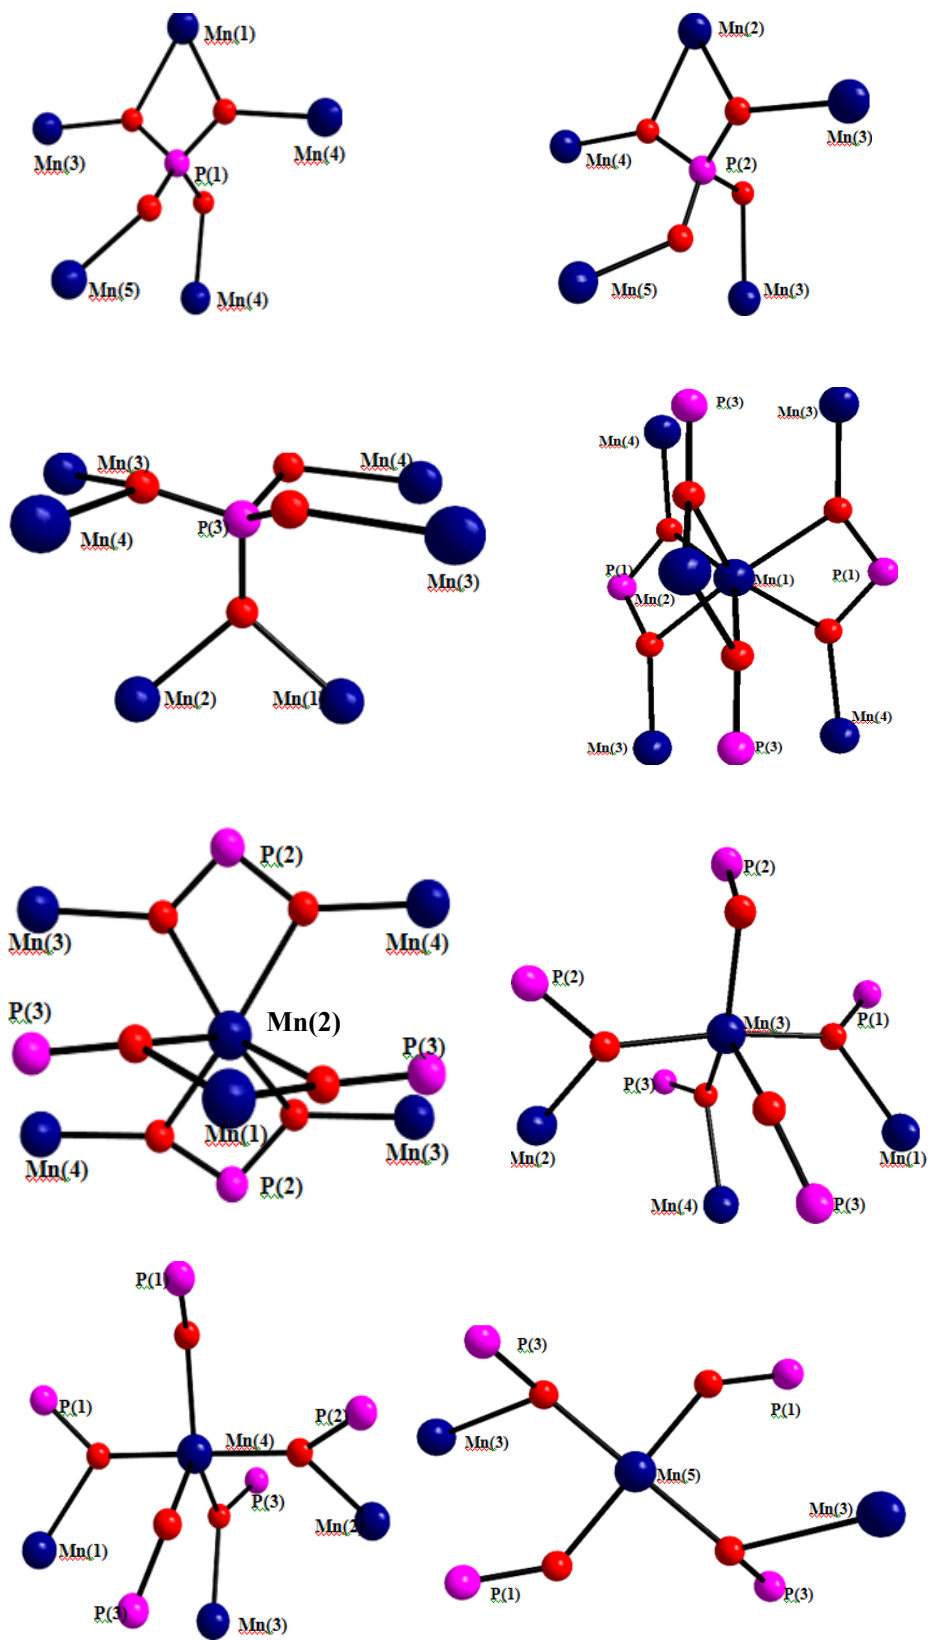

Figure S3. Oxygen-coordination environment of Mn and P atoms.

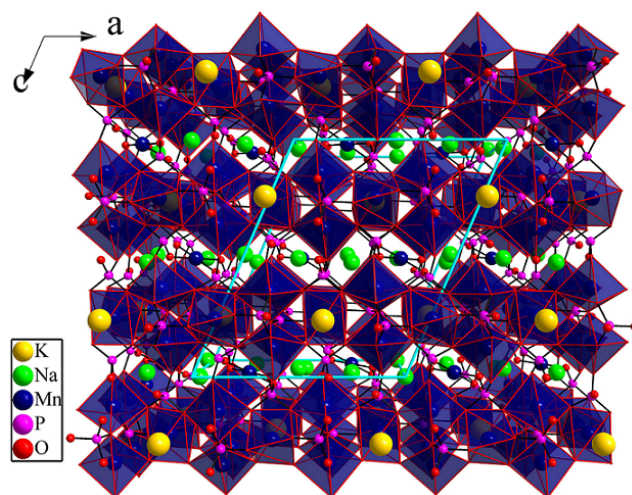

**Figure S4.** Perspective view of  $\text{KNa}_3\text{Mn}_7(\text{PO}_4)_6$ . The transparent blue polyhedra respect the pseudo-two-dimensional slabs.

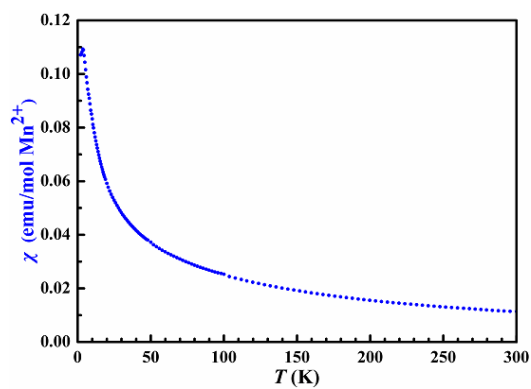

**Figure S5.** Dc magnetic susceptibility measured at 0.1 T for  $\text{KNa}_3\text{Mn}_7(\text{PO}_4)_6$ .

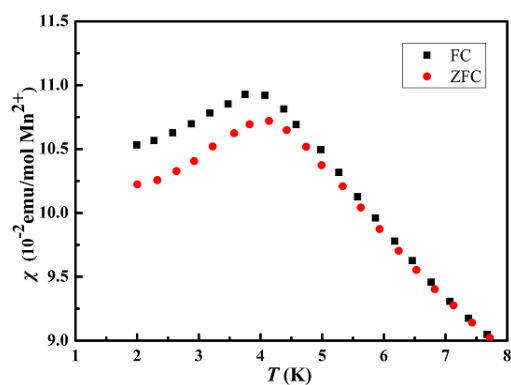

**Figure S6.** The low-temperature susceptibility for  $\text{KNa}_3\text{Mn}_7(\text{PO}_4)_6$  measured at 500 Oe with field-cooling (FC) and zero-field-cooling (ZFC) regimes.

**Table S1.** Crystal data and structure refinement of  $\text{KNa}_3\text{Mn}_7(\text{PO}_4)_6$ .

|                                          | $\text{KNa}_3\text{Mn}_7(\text{PO}_4)_6$ |
|------------------------------------------|------------------------------------------|
| space group                              | $C 2/c$                                  |
| a/ Å                                     | 13.165(8)                                |
| b/ Å                                     | 10.907(6)                                |
| c/ Å                                     | 15.960(1)                                |
| $\beta^\circ$                            | 113.243(9)                               |
| V/ Å <sup>3</sup>                        | 2106(2)                                  |
| Z                                        | 4                                        |
| $D_{\text{calcd}}/\text{g.cm}^{-3}$      | 3.351                                    |
| $\mu(\text{Mo-K}\alpha)/\text{mm}^{-1}$  | 6.139                                    |
| GOF on $F^2$                             | 0.932                                    |
| R1, wR2[I > 2 $\sigma$ (I)] <sup>a</sup> | 0.0517, 0.0961                           |
| R1, wR2(all data)                        | 0.0945, 0.1181                           |

---

$$^a\text{R1} = \sum||\text{Fo}| - |\text{Fc}||/\sum|\text{Fo}|, \text{wR2} = \{\sum\text{w}[(\text{Fo})^2 - (\text{Fc})^2]^2/\sum\text{w}[(\text{Fo})^2]^2\}^{1/2}$$

**Table S2.** Atomic coordinates and equivalent isotropic displacement parameters of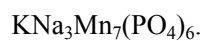

|       | x        | y        | z        | U(eq) |
|-------|----------|----------|----------|-------|
| K     | -5000    | 2622(3)  | -2500    | 80(1) |
| Na(1) | -2500    | 2500     | -5000    | 46(2) |
| Na(2) | -187(3)  | 2395(3)  | -173(3)  | 39(1) |
| Mn(1) | 0        | 1212(1)  | -2500    | 12(1) |
| Mn(2) | 0        | 4176(1)  | -2500    | 16(1) |
| Mn(3) | -3176(1) | 394(1)   | -3746(1) | 13(1) |
| Mn(4) | 1892(1)  | -6(1)    | -3599(1) | 13(1) |
| Mn(5) | -2500    | -2500    | -5000    | 61(1) |
| P(1)  | -878(1)  | -3(2)    | -4206(1) | 11(1) |
| P(2)  | -4065(1) | -8(2)    | -5714(1) | 12(1) |
| P(3)  | -2113(2) | 2707(2)  | -2298(1) | 13(1) |
| O(1)  | -1546(3) | 597(4)   | -3703(3) | 15(1) |
| O(2)  | 339(3)   | 128(4)   | -3509(3) | 15(1) |
| O(3)  | -924(3)  | 2678(4)  | -2260(3) | 16(1) |
| O(4)  | -3459(4) | 212(4)   | -6354(3) | 19(1) |
| O(5)  | -2112(4) | 2008(4)  | -1465(4) | 21(1) |
| O(6)  | -1081(4) | 717(4)   | -5065(3) | 20(1) |
| O(7)  | -2457(3) | 4063(4)  | -2274(3) | 13(1) |
| O(8)  | -3960(4) | 1114(4)  | -5121(3) | 20(1) |
| O(9)  | -3604(4) | -1091(4) | -5068(3) | 19(1) |
| O(10) | -1131(4) | -1359(4) | -4406(4) | 21(1) |
| O(11) | -2949(4) | 2163(5)  | -3183(4) | 29(2) |
| O(12) | -4732(3) | 238(4)   | -3605(3) | 20(1) |

**Table S3.** Selected bond lengths and angles of  $\text{KNa}_3\text{Mn}_7(\text{PO}_4)_6$ .

|                    |           |                      |           |                   |            |
|--------------------|-----------|----------------------|-----------|-------------------|------------|
| K-O(10)#1          | 3.022(6)  | K-O(12)#4            | 3.239(6)  | K-O(2)#1          | 3.291(6)   |
| K-O(11)#3          | 3.325(5)  | Na(1)-O(8)#5         | 2.393(5)  | Na(1)-O(6)#3      | 2.726(5)   |
| Na(1)-O(1)#5       | 2.850(5)  | Na(2)-O(8)#6         | 2.269(5)  | Na(2)-O(10)#7     | 2.350(6)   |
| Na(2)-O(6)#8       | 2.404(6)  | Na(2)-O(9)#1         | 2.427(6)  | Na(2)-O(3)#3      | 3.094(7)   |
| Mn(1)-O(3)         | 2.133(5)  | Mn(1)-O(3)#8         | 2.133(5)  | Mn(1)-O(2)#8      | 2.181(5)   |
| Mn(1)-O(2)         | 2.181(5)  | Mn(1)-O(1)           | 2.280(4)  | Mn(1)-O(1)#3      | 2.280(4)   |
| Mn(2)-O(3)#3       | 2.159(5)  | Mn(2)-O(3)           | 2.159(5)  | Mn(2)-O(4)#6      | 2.232(4)   |
| Mn(2)-O(4)#5       | 2.232(4)  | Mn(2)-O(12)#1        | 2.252(5)  | Mn(2)-O(12)#9     | 2.252(5)   |
| Mn(3)-O(7)#10      | 2.094(5)  | Mn(3)-O(11)#3        | 2.099(5)  | Mn(3)-O(1)        | 2.130(5)   |
| Mn(3)-O(12)#3      | 2.154(5)  | Mn(3)-O(8)           | 2.170(5)  | Mn(4)-O(4)#11     | 2.105(5)   |
| Mn(4)-O(2)         | 2.111(5)  | Mn(4)-O(6)#11        | 2.119(5)  | Mn(4)-O(7)#12     | 2.192(5)   |
| Mn(4)-O(5)#8       | 2.213(5)  | Mn(5)-O(10)#13       | 2.085(4)  | Mn(5)-O(10)       | 2.085(4)   |
| Mn(5)-O(9)#13      | 2.088(5)  | Mn(5)-O(9)           | 2.088(5)  | P(1)-O(6)         | 1.510(5)   |
| P(1)-O(10)         | 1.522(5)  | P(1)-O(1)            | 1.550(5)  | P(1)-O(2)         | 1.554(4)   |
| P(2)-O(8)#3        | 1.520(5)  | P(2)-O(9)            | 1.528(5)  | P(2)-O(4)         | 1.543(5)   |
| P(2)-O(12)#15      | 1.547(5)  | P(3)-O(11)           | 1.527(5)  | P(3)-O(5)         | 1.532(6)   |
| P(3)-O(3)          | 1.543(5)  | P(3)-O(7)            | 1.551(5)  | O(3)-Mn(1)-O(3)   | 82.9(3)    |
| O(3)#3-Mn(1)-O(2)  | 88.66(19) | O(3)-Mn(1)-O(2)      | 146.74(8) | O(3)-Mn(1)-O(2)   | 88.66(9)   |
| O(2)#8-Mn(1)-O(2)  | 114.3(3)  | O(3)#3-Mn(1)-O(1)    | 89.38(17) | O(3)-Mn(1)-O(1)   | 116.91(8)  |
| O(2)#8-Mn(1)-O(1)  | 95.01(17) | O(2)-Mn(1)-O(1)      | 66.00(16) | O(2)-Mn(1)-O(1)   | 95.01(7)   |
| O(2)-Mn(1)-O(1)#3  | 66.00(16) | O(3)#8-Mn(1)-O(1)#8  | 89.38(17) | O(2)-Mn(1)-O(1)   | 95.01(7)   |
| O(1)-Mn(1)-O(1)#8  | 145.7(2)  | O(3)-Mn(2)-O(3)#8    | 81.7(2)   | O(3)-Mn(2)-O(4)   | 118.34(9)  |
| O(3)-Mn(2)-O(4)#5  | 88.75(17) | O(4)#6-Mn(2)-O(4)#5  | 145.2(3)  | O(3)-Mn(2)-O(12)  | 88.65(9)   |
| O(3)#8-Mn(2)-O(12) | 143.30(8) | O(4)#6-Mn(2)-O(12)#1 | 64.97(17) | O(4)-Mn(2)-O(12)  | 96.61(8)   |
| O(3)#8-Mn(2)-O(12) | 88.65(19) | O(4)#6-Mn(2)-O(12)#9 | 96.61(18) | O(12)-Mn(2)-O(2)  | 118.1(3)   |
| O(7)-Mn(3)-O(11)#3 | 111.0(2)  | O(11)-Mn(3)-O(1)#3   | 85.37(18) | O(7)-Mn(3)-O(1)   | 87.72(8)   |
| O(7)-Mn(3)-O(12)#3 | 88.09(18) | O(11)-Mn(3)-O(12)#3  | 90.50(19) | O(1)-Mn(3)-O(12)  | 172.6(9)   |
| O(7)-Mn(3)-O(12)   | 88.09(18) | O(7)#10-Mn(3)-O(8)#3 | 157.2(19) | O(11)-Mn(3)-O(8)  | 91.7(2)    |
| O(12)-Mn(3)-O(8)#3 | 92.37(18) | O(1)-Mn(3)-O(8)      | 93.84(19) | O(7)-Mn(3)-O(9)   | 95.36(8)   |
| O(11)#3-Mn(3)-O(9) | 152.7(2)  | O(1)-Mn(3)-O(9)      | 89.08(17) | O(12)-Mn(3)-O(9)  | 97.4(18)   |
| O(8)-Mn(3)-O(9)    | 61.98(17) | O(4)#11-Mn(4)-O(2)   | 177.28(9) | O(4)-Mn(4)-O(6)   | 92.1(19)   |
| O(2)-Mn(4)-O(6)#11 | 88.66(19) | O(2)-Mn(4)-O(7)#12   | 89.26(18) | O(6)-Mn(4)-O(7)   | 130.6(2)   |
| O(4)-Mn(4)-O(5)#8  | 89.75(18) | O(2)-Mn(4)-O(5)#8    | 92.32(18) | O(6)-Mn(4)-O(5)   | 114.50(19) |
| O(10)-Mn(5)-O(10)  | 180.0(2)  | O(10)-Mn(5)-O(9)#13  | 92.48(19) | O(10)-Mn(5)-O(9)  | 87.5(19)   |
| O(9)#13-Mn(5)-O(9) | 180.00(1) | O(10)-Mn(5)-O(5)#10  | 98.83(18) | O(9)-Mn(5)-O(5)   | 100.28(18) |
| O(9)-Mn(5)-O(5)#10 | 79.72(18) | O(10)#13-Mn(5)-O(5)  | 98.83(18) | O(10)-Mn(5)-O(5)  | 81.7(18)   |
| O(9)#13-Mn(5)-O(5) | 79.72(18) | O(6)-P(1)-O(10)      | 111.6(3)  | O(6)#3-P(1)-O(1)  | 108.5(3)   |
| O(6)-P(1)-O(1)#3   | 108.5(3)  | O(10)-P(1)-O(1)#3    | 113.3(3)  | O(6)-P(1)-O(2)    | 111.4(3)   |
| O(1)-P(1)-O(2)     | 103.1(3)  | O(8)-P(2)-O(9)       | 106.7(3)  | O(8)-P(2)-O(4)    | 110.1(3)   |
| O(9)-P(2)-O(4)     | 113.3(3)  | O(8)-P(2)-O(12)#15   | 112.6(3)  | O(9)-P(2)-O(12)   | 111.9(3)   |
| O(4)-P(2)-O(12)#15 | 102.4(3)  | O(11)-P(3)-O(5)      | 111.3(3)  | O(11)-P(3)-O(3)#3 | 112.2(3)   |
| O(5)-P(3)-O(3)#3   | 107.6(3)  | O(11)-P(3)-O(7)      | 106.4(3)  | O(5)-P(3)-O(7)    | 110.7(3)   |

---

Symmetry transformations used to generate equivalent atoms: #1  $-x-1/2, y+1/2, -z-1/2$ ; #2  $x-1/2, y+1/2, z$ ; #3  $x, y, z$ ; #4  $-x-1, y, -z-1/2$ ; #5  $-x-1/2, -y+1/2, -z-1$ ; #6  $x+1/2, -y+1/2, z+1/2$ ; #7  $x, -y, z+1/2$ ; #8  $-x, y, -z-1/2$ ; #9  $x+1/2, y+1/2, z$ ; #10  $-x-1/2, y-1/2, -z-1/2$ ; #11  $-x, -y, -z-1$ ; #12  $x+1/2, y-1/2, z$ ; #13  $-x-1/2, -y-1/2, -z-1$ ; #14  $x, -y, z-1/2$ ; #15  $-x-1, -y, -z-1$ ; #16  $x-1/2, y-1/2, z$ .
